# Supplementary material for: Photocatalytic Properties of ZnO:Al/MAPbI3/Fe2O3 Heterostructure: First-Principles Calculations
Source: MDPI journal article supplement (doi:10.3390/ijms24054856), 2023-03-02
Supplement: s1 [file s1]

# Photocatalytic Properties of ZnO: Al/MAPbI<sub>3</sub>/Fe<sub>2</sub>O<sub>3</sub> Heterostructure: First-Principles Calculations

Ahmed Al-Shami <sup>1,2</sup>, Anass Sibari <sup>3</sup>, Zouhir Mansouri <sup>1</sup>, Majid EL Kassaoui <sup>1</sup>, Abdallah El Kenz <sup>1</sup>, Abdelilah Benyoussef <sup>5</sup>, Mohammed Loulidi <sup>1</sup>, Mustapha Jouiad <sup>6</sup>, Amine El Moutaouakil <sup>7,\*</sup> and Omar Mounkachi <sup>1,4,\*</sup>

- <sup>1</sup> Laboratory of Condensed Matter and Interdisciplinary Sciences, Physics Department, Faculty of Sciences, Mohammed V University in Rabat, Rabat 10100, Morocco; yemen.ye@gmail.com (A.A.-S.); zouhirmansouri.2016@gmail.com (Z.M.); psmajid0@gmail.com (M.E.K.); akenzele@yahoo.com (A.E.K.); loulidim60@gmail.com (M.L.)
- <sup>2</sup> Department of Physics, Faculty of Science, Sana'a University, Sana'a 13060, Yemen
- <sup>3</sup> Supramolecular Nanomaterials Group, Mohammed VI Polytechnic University, Lot 660, Hay Moulay Rachid Ben Guerir 43150, Morocco; sibari.anass@gmail.com
- <sup>4</sup> Modeling, Simulation and Data Analysis, Mohammed VI Polytechnic University, Lot 660, Hay Moulay Rachid Ben Guerir 43150, Morocco
- <sup>5</sup> Hassan II Academy of Science and Technology in Rabat, Rabat 10112, Morocco; benyous.a@gmail.com
- <sup>6</sup> Laboratory of Physics of Condensed Matter, University of Picardie Jules Verne, Scientific Pole, 33 rue Saint-Leu, CEDEX 1, 80039 Amiens, France; mustapha.jouiad@u-picardie.fr
- <sup>7</sup> Department of Electrical and Communication Engineering, College of Engineering, UAE University, Al Ain P.O. Box 15551, United Arab Emirates
- \* Correspondence: a.elmoutaouakil@uaeu.ac.ae (A.E.M.); omar.mounkachi@fsr.um5.ac.ma (O.M.)

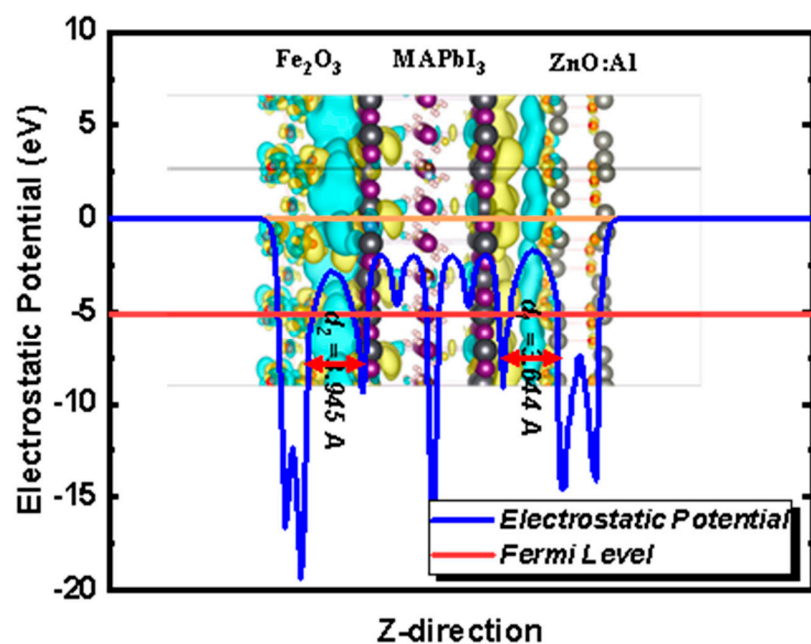

Figure S1: The work function of  $\text{Fe}_2\text{O}_3/\text{MAPbI}_3/\text{ZnO:Al}$  heterostructure. The red and yellow lines denote the Fermi level  $E_F$ , and the vacuum energy level  $E_{\text{vac}}$ , respectively and planar-averaged electron density difference in blue.

Equations used to compute different physical properties given in the manuscript

$$p_{s_2} = p_{v_2} \times e^{\frac{qV_{bi2}}{k_B T}}$$

$$p_{v_2} = N_{c2} \times e^{\frac{E_{F02} - E_{C02}}{k_B T}}$$

$$V_{bi_{12}} = E_{F02} - E_{F01}$$

$$n_{s_2} = n_{v_2} \times e^{\frac{-qV_{bi2}}{k_B T}}$$

$$n_{v_2} = N_{c2} \times e^{\frac{E_{F02} - E_{C02}}{k_B T}}$$

$$V_{bi_{12}} = E_{F02} - E_{F01}$$

**Equations used to compute for H<sub>2</sub> production yield by rate of generation of excess carriers (unit volume/time):**

$$\Delta i_{ph} = V \Delta G$$

$$\Delta G = \frac{A}{w} \Delta \sigma$$

$$\Delta \sigma = q(\mu_n + \mu_p) \Delta n$$

$$\Delta n = \tau_n \Delta G_L$$

Generation rate due to light:

$$\Delta G_L = \frac{\eta \Delta P}{h\nu A w}$$

$$\Delta i_{ph} = V \frac{A \tau_n}{w} q(\mu_n + \mu_p) \frac{\eta \Delta P}{h\nu A w}$$

$$\Delta i_{ph} = \frac{\Delta Q}{\Delta t} = \frac{\eta \Delta P}{h\nu} q \left( \frac{\tau_n}{t} \right)$$

$$n_e = \frac{\Delta Q}{q} = \frac{\eta \Delta P}{h\nu} \left( \frac{\tau_n}{t} \right) \Delta t$$

$$\Delta n = \Delta p$$

$$n_0 = N_C e^{\frac{-(E_C - E_F)}{k_B T}}$$

$$\Delta n = n_0 e^{\frac{-qV_{bi}}{k_B T}}$$

$$N_C = 2 \left( \frac{2\pi m_e^* k_B T}{h^2} \right)^{\frac{3}{2}}$$

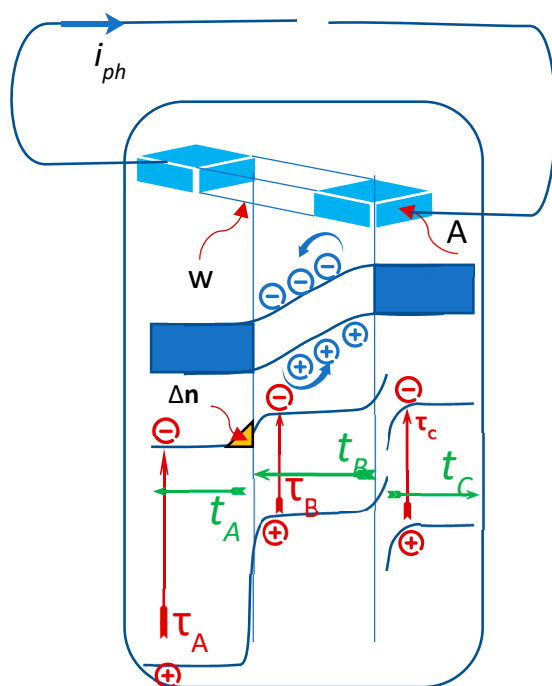

Figure S2:  $\text{Fe}_2\text{O}_3/\text{MAPbI}_3/\text{ZnO:Al}$  heterostructure schematic and photocatalytic activity measurements set up
